## 1 **Title**

2 OMGene: Mutual improvement of gene models through optimisation of evolutionary conservation

## 3 **Authors**

4 Michael P. Dunne<sup>1</sup>, Steven Kelly<sup>2</sup>

## 5 **Author affiliations**

6 <sup>1,2</sup>Department of Plant Sciences, University of Oxford, South Parks Road, OX1 3RB, UK

## 7 **Corresponding author**

8 <sup>2</sup>E-mail: [steven.kelly@plants.ox.ac.uk](mailto:steven.kelly@plants.ox.ac.uk), phone: +44 (0) 1865 275123

## 9 **Abstract**

### 10 **Background**

11 The accurate determination of the genomic coordinates for a given gene – its *gene model* – is of  
12 vital importance to the utility of its annotation, and the accuracy of bioinformatic analyses derived  
13 from it. Currently-available methods of computational gene prediction, while on the whole successful,  
14 often disagree on the model for a given predicted gene, with some or all of the variant gene models  
15 failing to match the biologically observed structure. Many prediction methods can be bolstered by  
16 using experimental data such as RNA-seq and mass spectrometry. However, these resources are  
17 not always available, and rarely give a comprehensive portrait of an organism's transcriptome due  
18 to temporal and tissue-specific expression profiles.

### 19 **Results**

20 Orthology between genes provides evolutionary evidence to guide the construction of gene models.  
21 OMGene (Optimise My Gene) aims to optimise gene models in the absence of experimental data by  
22 optimising the derived amino acid alignments for gene models within orthogroups. Using RNA-seq  
23 data sets from plants and fungi, considering intron/exon junction representation and exon coverage,  
24 and assessing the intra-orthogroup consistency of subcellular localisation predictions, we  
25 demonstrate the utility of OMGene for improving gene models in annotated genomes.

## 26 **Conclusions**

27 We show that significant improvements in the accuracy of gene model annotations can be made in  
28 both established and *de novo* annotated genomes by leveraging information from multiple species.

## 29 ***Introduction***

30 The utility of any given genome is dependent on the comprehensiveness and accuracy of its  
31 proteome annotation. Inaccuracies in the annotated locations and structures of protein coding genes  
32 can lead to myriad downstream errors. These include misinformed conclusions about the biological  
33 properties of an organism, as well as errors in transcript quantification, phylogenetic tree inference,  
34 protein localisation, and protein structure predictions. It is therefore vital to downstream analysis,  
35 both computational and experimental, to ensure that gene annotations are as accurate as possible.

36 The absolute quantity of publicly available genomic data has grown exponentially over the past two  
37 decades, as has the number of taxa represented [1]–[3], owing to the consistently decreasing costs  
38 of acquiring whole genome sequences [4], [5]. Accordingly, the feasibility of manual proteome  
39 annotation has diminished progressively, with a corresponding increase in reliance on computational  
40 gene prediction software. As such there are numerous tools available for the *de novo* and data-  
41 assisted prediction of genes [6]. These tools typically rely on genetic signatures such as GC content,  
42 codon bias, feature length distributions, and various conserved DNA sequence motifs. Though many  
43 of these tools are highly proficient at gene prediction, mistakes are common. Gene prediction tools  
44 often disagree on the quantity of genes that they predict [7]–[9]. Furthermore, even when gene  
45 predictors agree on the location of a gene, the predicted intron-exon structure for that gene can vary  
46 considerably between the different methods [10]. Common such errors include erroneous  
47 exon/intron retention/omission, inaccurate exon/intron boundaries, frame errors, misplaced start  
48 codons, and fragmentation/fusion of gene models.

49 When available, the use of extrinsic empirical data, most notably RNA-seq, is the most reliable  
50 currently available method for procuring gene models. For example, single contiguous RNA-seq  
51 reads obtained from mRNA sequencing can be split across multiple loci when mapped to the  
52 genome, providing evidence for the locations of splice junctions. Unfortunately, empirical data is

53 generally not available for all genes in a given species: many genes are expressed in a cell-type or  
54 cell-cycle specific manner and for organisms with many disparate tissue types it can be difficult to  
55 obtain RNA-seq data that covers the full breadth of the transcriptome [11], [12]. In addition, not all  
56 gene sequences are amenable to reliable and accurate alignment, in particular identical duplicate  
57 genes and genes that contain repetitive regions found in multiple other genes [13]. Furthermore  
58 library preparation protocols and other statistical factors can make reliable inferences difficult [14]–  
59 [16]. Finally, there are some aspects of gene models that are simply not revealed by RNA-seq  
60 analysis: for example the presence of 5'UTR sequences or internal methionine residues mean that  
61 there can often be multiple plausible start codons locations for a given open reading frame (ORF).  
62 Feature locations (splice sites, exons, transcription start sites) have been shown to be highly  
63 conserved across evolutionary timescales, often more so than the constituent amino acid sequences  
64 they encapsulate [17], [18], despite alternative splicing being a driver of divergence [19]. Given  
65 various gene model predictions, it is logical that if multiple highly similar (in sequence and structure)  
66 gene models exist for a gene across multiple taxa, they are more likely to be biologically correct than  
67 disparate alternatives. By considering *orthogroups* of related genes, one can optimise the similarity  
68 of gene models across species by seeking conserved structure across the various taxa. In the  
69 absence of extrinsic data, it is parsimonious to choose gene models that maximise intra-orthogroup  
70 agreement.

71 OMGene (Optimise My Gene) aims to improve genome annotations by optimising the agreement  
72 between gene models for orthologous genes in multiple species. It is designed to function without  
73 the need for additional empirical data, utilising only the local genome sequences for the genes in  
74 question, and works on existing predicted gene models. A standalone implementation of the  
75 algorithm is available under the GPLv3 licence at <https://github.com/mpdunne/omgene>. The  
76 algorithm is available as a python script, instructions for which, along with example data sets, are  
77 included in the git repository.

78

## 79 **Results**

### 80 **Problem definition, algorithm overview and evaluation criteria**

81 An overview of the OMGene algorithm is provided in Figure 1. OMGene aims to find the most  
82 consistent set of representative gene models for a set of inputted genes by seeking to maximise the  
83 agreement of their aligned amino acid sequences, returning the single best gene model for each  
84 gene. The algorithm constructs gene models based on relatively simple constraints: AUG for start  
85 codons; GU or GC for splice donor sites, AG for splice acceptor sites, and UAA, UGA, or UAG for  
86 stop codons. Other features such as codon bias or poly-pyrimidine tracts are not considered.  
87 OMGene can also use non-canonical translation initiation and splice sites if inputted by the user as  
88 a command-line option.

89 The input for OMGene is a user-selected set of gene models, in GTF format, which are assumed to  
90 belong to a single *orthogroup*. For a given set of species, an *orthogroup* is the set of genes  
91 descended from a single ancestral gene in the last common ancestor of those species [20]: these  
92 may contain paralogous as well as orthologous genes, though OMGene is principally designed to  
93 work on single-copy genes. The suggested pipeline for using OMGene is to determine orthogroups  
94 using OrthoFinder [20], and to apply OMGene to a chosen subset of orthogroups.

95 OMGene uses Exonerate [21] as an initial step to cross-align amino acid sequences from all user-  
96 supplied genes to the genomic regions of the genes in question, in order to find conserved  
97 translatable features. It then combines this information with the original gene models to produce an  
98 initial set of prototype exonic regions, or *gene parts*, for optimisation. The amino acid sequences for  
99 these prototype gene models are then aligned, and the constituent gene parts are split into adjacency  
100 groups based on overlaps in the alignment (see Methods). Adjacency groups are sequentially  
101 appended to the gene models, and the genetic coordinates are recursively adjusted and assessed  
102 to optimise the agreement of the amino acid sequences. The resultant gene models are then subject  
103 to stringent filtering criteria before the finalised set of gene models are presented as sets of GTF  
104 coordinates, amino acid FASTA and CDS FASTA sequences.

105 To demonstrate the utility of OMGene, it was applied to orthogroups formed from two sets of test  
106 species: a set of five fungal species and a set of five plant species (Table 1). OMGene was applied  
107 to those orthogroups that contained exactly one gene from each species, referred to as single-copy  
108 ubiquitous (SCU) orthogroups. In addition, OMGene was run on the same set but with all genes from  
109 two representative species – *A. thaliana* and *S. cerevisiae* – replaced with *de novo* predicted genes,  
110 obtained by running the Augustus [22] gene finder on those genomes. These species were chosen  
111 as they have the best annotated genomes and thus the existing gene models will provide the best  
112 possible training set for Augustus *de novo* prediction. This *de novo* prediction analysis was done to  
113 simulate a typical genome-sequencing project where a user has generated a well-trained set of gene  
114 models solely using computational prediction.

115 OMGene was assessed in three ways: RNA-seq data was used to compare the quality of genes  
116 before and after application of OMGene, from both coverage (i.e. the proportion of the predicted  
117 gene that is encompassed by reads mapped from RNA-seq data) and splice junction perspectives.  
118 To assess the accuracy of start codon prediction, OMGene-modified gene models were subject  
119 subcellular localisation prediction and the results were evaluated for consistency across the  
120 orthogroup. The RNA-seq data used to assess the success of OMGene were downloaded from the  
121 NCBI Sequence Read Archive [23] and are listed in Table 2.

## 122 **Application of OMGene to publicly available datasets**

123

### 124 **Quantities and nature of changes made**

125 The full plant data set produced 3694 SCU orthogroups, containing 18470 genes. Application of  
126 OMGene to this test set resulted in gene model changes to one or more genes in 1543 (41.8%) of  
127 these orthogroups. In total, 2017 of the inputted genes (10.9%) were altered. Of these altered  
128 versions, 154 genes (7.6% of 2017) were present in the original annotation as alternative (non-  
129 primary) transcripts for the inputted gene. Figure 2 shows examples of various types of gene model  
130 alteration for genes in *A. thaliana*. A full breakdown of per-species change quantities can be found  
131 in Table 3, Figure 3 and Figure 4; Table 4 and Figure 5 show the distribution of the types of changes  
132 made. All gene models that were changed by OMGene are included in the supplementary material  
133 as a set of GTF files.

134 The plant species that experienced the highest number of changes were *C. papaya* and *T. cacao*,  
135 which is consistent with them being more recently published and less well-studied genomes. For all  
136 species, more nucleotides were removed than were added, indicating either that gene models  
137 predictions tend to be over-cautious or that OMGene is more proficient at removing material than at  
138 adding it in. In terms of the types of changes made, exon deletion was by far the most commonly  
139 seen change, followed by moved start codon and exon boundary adjustment (Figure 5). It should be  
140 noted that exon deletion events also encapsulate the separation of erroneously fused gene models,  
141 which can contribute many exon deletion events simultaneously.

142 For the full fungal data set, 2710 SCU orthogroups were considered, containing 13550 genes. Of  
143 these, 100 orthogroups (3.7%) exhibited some change, and 109 genes (0.8%) were altered. As  
144 above, a full breakdown of per-species change quantities can be found in Table 3, Figure 3, and  
145 Figure 4 with the full distribution of change types shown in Table 4 and Figure 5. In this case, *E.*  
146 *gossypii* was the most commonly altered proteome, consistent again with it being one of the lesser-  
147 studied species on the list. By far the most common change type in the fungal data set was a moved  
148 start codon, consistent with the fact that splicing is a rare event in fungal genes (on average 5.09  
149 exons for plants, 1.08 exons for fungi).

150 To simulate a *de novo* genome annotation project, OMGene was also applied to plant and fungal  
151 data sets with *de novo* predicted gene models for representative species, *A. thaliana* and *S.*  
152 *cerevisiae*. These species were chosen as they have the most complete annotations of their  
153 respective data sets, and therefore these genes are likely to be the most reliable for training a gene  
154 finding algorithm. The genome annotation tool used was Augustus (see Methods) as it is one of the  
155 best and most frequently used gene prediction algorithms.

156 For the plants data set with Augustus predictions for *A. thaliana*, 3694 SCU orthogroups were  
157 considered. Of these, 598 (16.2%) saw some change in an *A. thaliana* gene. For the fungi data set,  
158 2710 SCU orthogroups were considered. Of these, 19 (0.7%) saw some change in a *S. cerevisiae*  
159 gene. Table 3 and Table 4 show a full breakdown of the types and amounts of changes made. As  
160 expected, in both cases, the total number changes and the average size of change made is greater

161 for the *de novo* predicted gene models than the curated gene models. However, the distribution of  
162 types of changes made remained roughly the same.

### 163 **Splice junction and feature coverage analysis**

164 To assess the validity of changes made by OMGene, both the original and the updated gene model  
165 sets were compared using publicly available RNA-seq data from the NCBI Sequence Read Archive  
166 [23] (see Methods and Table 2). Each amended gene was assessed in two ways relative to this data:  
167 firstly by comparing the exact splice junction locations with RNA-seq derived splice junctions;  
168 secondly by evaluating the coverage of exonic regions with RNA-seq. To control for unreliable data,  
169 some genic regions were omitted from this analysis. Gene regions in which the RNA-seq data  
170 suggested there were indels in the reference genome, or that were within 1000bp of the end of a  
171 contig or scaffold, or that contained 10 or more contiguous “N” nucleotide bases were omitted from  
172 the analysis (see Methods). Regions with these characteristics prevent the creation of reliable gene  
173 models, and so are not useful for determining gene model accuracy.

174 Gene models outputted by OMGene were assessed on whether or not their junction and coverage  
175 F-scores (see Methods) had improved or been reduced. The full results can be seen in Table 5. For  
176 the plant data set, OMGene improved the agreement of the gene model with the splice junctions  
177 inferred from RNA-seq data for 729 genes, while 125 gene models exhibited reduced agreement  
178 (85.3% improved). Similarly, when assessing RNA-seq coverage of gene models OMGene improved  
179 the agreement of the models with the data for 1026 genes, while 167 genes exhibited reduced  
180 agreement (86.0% improved). For the *de novo* predicted *A. thaliana* genes, the success rates were  
181 essentially the same as for the public data (87.3% and 91.1% improved by junction and coverage F-  
182 scores respectively), but the absolute quantity of genes exhibiting a changed score increased  
183 roughly four-fold. This difference represents the considerable effort and evidence-based curation  
184 that has been invested in the *A. thaliana* genome annotation.

185 The results for the fungal data set (see Table 6) were not as good. Notably very few gene models  
186 showed any change in junction F-score, with only 8 genes exhibiting a changed score. This is due  
187 to the relatively simple exon structure of fungal genes, for which splicing is very rare, and splicing  
188 events predicted by OMGene are much less likely to be correct. In this case 3 genes had an improved

189 score, and 5 had a reduced score (37.5% success), with all 5 of the losing genes coming from *Y.*  
190 *lipolytica*. The most common change made to fungal genes was a moved start codon, which,  
191 although not detectable in the junction F-score, can be detectable in the coverage F-score. This is  
192 reflected in the results, where 30 genes showed an improved coverage F-score and 10 genes  
193 showed a worse coverage F-score (75% improved). In the *de novo* case, again the numbers  
194 increased while the percentage success remained roughly the same, with 4 (100%) genes improving  
195 by junction for *S. cerevisiae* and 11 (64.7%) improving by coverage score. The highly compact nature  
196 of fungal genomes, with few exons and limited space between genes means that the accuracy of *de*  
197 *nov*o predicted genes is higher than in plants. Thus the utility of OMGene on these comparatively  
198 simpler genomes is limited.

199 Many of the cases for which OMGene results differ from RNA-seq evidence are attributable to real  
200 biological variability that confounds the evaluation criteria of the algorithm. For example, there are  
201 some instances where the most evolutionary conserved splice site was not the splice site observed  
202 in the RNA-seq data. Such events, by definition, cannot be detected by OMGene. Furthermore, RNA-  
203 seq mapping errors also contributed to reduced scores, as did artefacts resulting from spliced UTRs,  
204 and jagged read profiles, particularly in the fungal data, that made some coverage scores difficult to  
205 calculate reliably. Finally, the presence of multiple transcript isoforms within the RNA-seq data can  
206 reduce the score for a valid transcript even if it is the best choice for that particular gene. While users  
207 of OMGene should be aware of these confounding factors, the above data demonstrates that, in  
208 general, OMGene is much more likely to improve a given gene model than not.

### 209 **Assessment of subcellular localisation predictions for 5' end analysis**

210 Given that genes from the same orthogroup are, by definition, assumed to be evolutionarily related,  
211 it is reasonable to assume that they should be consistent in their predicted subcellular localisation.  
212 Several sub-cellular targeting sequences are located at the N-termini of genes [24], thus one expects  
213 genes with inaccurately predicted start codons to yield inaccurate results when assessing their  
214 targeting signals. Genes belonging to orthogroups changed by OMGene were assessed to  
215 determine whether the changes resulted in increased consistency of their predicted subcellular  
216 localisation characteristics of all genes in the orthogroup. Targeting predictions were made using



217 TargetP [25], and Shannon entropy was calculated to assess the consistency of the predictions  
218 within the orthogroups (see Methods). Entropy scores were compared only for orthogroups in which  
219 at least one gene model was altered by OMGene. An entropy score of 0 indicates that all members  
220 of the orthogroup are predicted to localise to the same sub-cellular compartment; the worst possible  
221 entropy score given five genes and four possible localisations identified by TargetP (chloroplast,  
222 mitochondrion, secreted, cytoplasmic) is  $-\frac{2}{5}\log_2\left(\frac{1}{5}\right) - \frac{3}{5}\log_2\left(\frac{1}{5}\right) \approx 1.92$ , indicating that only two of  
223 the genes agree. An example orthogroup whose prediction entropy score has been improved by  
224 start codon adjustment can be seen in Figure 6**Error! Reference source not found.**

225 The 1543 plant orthogroups in which one or more genes were altered were subject to subcellular  
226 prediction analysis. Of these, gene model changes made by OMGene resulted in changes in  
227 predicted subcellular localisation for one or more constituent members of 55 orthogroups. In total,  
228 74 improved agreement between gene models (74%), 13 remained the same (13%), and 13%  
229 increased entropy and thus increased disagreement between gene models. In contrast, for the fungal  
230 dataset only 7 out of 95 changed orthogroups exhibited a change in subcellular localisation  
231 prediction, with 6 of these changes improving the consistency of localisation prediction (85.7%) and  
232 1 increasing disagreement (14.3%). Similar results were obtained for the simulated *de novo*  
233 annotation analysis in plants, although again the data were sparse here. Orthogroups containing the  
234 *de novo* predicted *A. thaliana* gene were considered together with the four original genes for the  
235 other species. Here, 11 of the *A. thaliana* genes experienced a change in subcellular localisation  
236 following application of OMGene. Of the 11 orthogroups containing these, 9 improved consistency  
237 (81.9%) and 2 reduced the consistency (18.2%). For the fungal data set, the data was extremely  
238 sparse, with only one gene experiencing a change in its targeting prediction, which reduced the  
239 consistency for its parent orthogroup. Thus, although data were sparse for the fungal dataset, in both  
240 the fungi and plant dataset the consistency of gene models was improved from a subcellular  
241 targeting perspective.

## 242 **Discussion**

243 Here we present OMGene, an automated method for improving the consistency of gene model  
244 annotations across species. OMGene is intended for use in computational *de novo* genome  
245 annotation projects where no empirical data (such as RNA-seq data) is available to train or correct  
246 gene model predictions, or to assist the construction of gene models for genes that are not expressed  
247 in the data available. OMGene is also designed to help users who wish to leverage conservation  
248 information to correct gene models of a single gene of interest across a set of species. Thus OMGene  
249 is suitable for both large and small scale analyses.

### 250 **OMGene results reflect differences in gene model complexity between species sets**

251 To demonstrate the utility and performance characteristics of OMGene, it was applied to two  
252 separate datasets of well-annotated plant and fungal genomes. When applied to the plant data set,  
253 OMGene altered the gene models of one or more genes in 41.8% of the orthogroups that were  
254 evaluated. In contrast, only 3.7% of orthogroups were subject to modification in the fungal data set.  
255 This result reflects the differences in gene model complexity between the two species groups.  
256 Specifically, gene models in plants tend to have more exons than fungi (mean = 5.09 exons for  
257 plants, 1.08 exons for fungi) and thus there is considerably more potential for gene model variation  
258 in plants than in fungi. In light of this it was unsurprising that the most frequently observed change  
259 made in fungi was a change in choice of start codon. This is also reflected in the high number of  
260 removed exons from plant genes, which is contributed to partly by the separation of erroneously  
261 fused adjacent genes.

### 262 **OMGene works well on complex gene models**

263 The changes made by OMGene were assessed relative to splice-mapped RNA-seq data to assess  
264 the level to which it had improved the gene models. For the plant data set, the results from OMGene  
265 clearly resembled the empirical data much more closely on the whole, with 85.4% and 86.0% of  
266 genes improving in terms of their splice junctions and their coverage respectively. The profiles were  
267 different for different species, with many more changes being made for *C. papaya* and *T.cacao*; in  
268 addition the number of successes for *B. rapa* was slightly lower than for the other species.

269 The number of junction changes made for the fungal data set was considerably lower: only 8  
270 changed genes had an altered junction F-score, 62.5% of which become worse after OMGene.  
271 Though this is less than the plant data set, it should be noted that the resolution of this data set does  
272 not lend itself to accurate conclusions about the general validity of changes made to fungal genes.  
273 The resolution and success rate for fungal genes from a coverage perspective was slightly higher,  
274 with 75% of the genes with changed scores improving. The low resolution of junction data for fungal  
275 genes reflects the rarity of complex gene models in these species, and thus the low likelihood that  
276 deviations from simple, single-exon gene models are correct. Thus, while OMGene does not always  
277 produce gene models that agree optimally with transcriptome data, it does improve the overall quality  
278 of gene model annotations even for relatively simple fungal genomes.

279 The improvements in gene model accuracy made by OMGene for the *de novo* predicted proteomes  
280 were much the same as for the publicly available, curated genes models. However, the number of  
281 changes made to the *de novo* predicted set was much greater, indicating that the considerable labour  
282 that has been applied to these model organisms has successfully controlled for potential errors. It  
283 should be noted that, although OMGene managed to improve many of the gene models outputted  
284 by Augustus, the two agreed in most cases (86.1% and 98.6% for plants and fungi respectively),  
285 indicating that the basic implementation of a well-trained Augustus *de novo* prediction produces  
286 genes that are highly consistent with their orthogroups.

### 287 **OMGene improves the consistency of subcellular localisation predictions**

288 In addition to assessment of splice junctions, gene models were assessed by the consistency of their  
289 predicted subcellular localisation. Given that the orthogroups used in this analysis comprise  
290 ubiquitously conserved single copy genes, it is logical to assume that these genes should generally  
291 have the same subcellular localisation. For the full plant data set, of all orthogroups whose genes  
292 had different subcellular targeting predictions after application of OMGene, 76.4% had improved  
293 intra-orthogroup consistency, with 85.5% either improving or remaining the same. For the full fungal  
294 data set, although the data were sparse, 85.7% of the orthogroups considered had improved  
295 consistency.

296 The results for the plant data set were similar for the *de novo* annotated set (85.7% improvement).  
297 For fungal orthogroups containing *de novo* predicted *S. cerevisiae* genes, the only gene whose  
298 localisation prediction changed caused the consistency of its orthogroup to decrease, however the  
299 resolution of the data in this case is not sufficient to draw any conclusions. Thus, application of  
300 OMGene improves the accuracy of start codon specification in gene models.

## 301 **Conclusion**

302 When applied to publicly available plant and fungal data sets, OMGene demonstrates proficiency in  
303 improving gene models from multiple perspectives. The overall improvement is larger for genomes  
304 with complex gene models.

## 305 **Methods**

### 306 **Algorithm description**

307 The input for OMGene is a set of GTF gene model files and a set of corresponding FASTA genome  
308 files. There should be one GTF per FASTA file, and each GTF should contain the coordinate  
309 information for a single gene. If the GTF contains multiple transcript variants then these are  
310 considered together as variants of a single gene.

311 For each inputted gene, the algorithm defines its *gene region* to be the region spanning the first and  
312 last base of any of its corresponding gene models, with a user-selected number of buffer bases  
313 either side (default value is 600bp). The initial step of OMGene is to cross-align the amino acid  
314 sequences from each gene with the gene regions of the other genes, using Exonerate [21]. The  
315 rationale behind this step is to find exonic regions that are present in one or more gene models but  
316 absent from one or more annotated gene model. This is performed three times: first by cross-aligning  
317 the input protein sequences against all gene regions, second by cross aligning the protein sequences  
318 that have been found in the first step against all gene regions, and finally by cross aligning all  
319 individual exon sequences from the first step. This three-step process mitigates against lack of  
320 detection due to gene model errors in one or more of the input genes. This, together with the exons  
321 from the original gene sequences, comprises a set of potential gene parts, which may overlap and  
322 which may be incompatible in reading frame. Compatible combinations of gene parts (i.e. without

323 frame-shift errors) are strung together to form a putative gene model. Many such putative gene  
324 models may exist: the set of putative gene models with the highest alignment score (see alignment  
325 score calculation below) is carried forward to the next step.

326 The set of putative gene models from the previous step are aligned, and the set of putative exons  
327 from all genes is divided into *adjacency groups*: sets of exons that overlap each other in the  
328 alignment (see below). Exons are added in sequentially in these adjacency groups, and at each  
329 stage a valid gene model is sought on the left hand side of the gene (i.e. starting at the start codon  
330 and seeking to adjoin exons in valid donor-acceptor pairs). Multiple options for each gene are  
331 produced at each new junction, by recursively seeking out, or “wiggling” splice junctions (or start  
332 codons) in each frame either side of the existing exons start and end points. This produces a set of  
333 junction options for each pair of exon ends. A multipartite choice function is then used to choose the  
334 best option for each pair of exons, as described below. In the event that a particular exon is very  
335 small (<40bp), or does not yield any valid junction sites, both that exon and the one before it are  
336 probed for removal, and the variant with the removed exon is compared against the other partial  
337 gene models in the evaluation step. Once this recursive step ceases to produce new gene modes,  
338 the gene model set with the highest alignment score is declared the winner, and the next putative  
339 exon from the next adjacency group is added. This is repeated until there are no further exons to  
340 add.

341 To ensure that the optimisation process did not overlook potentially better variants in the user-  
342 supplied gene models, the process above is repeated. This time, instead of varying exons start and  
343 end sites, the set of newly created junctions are compared against the original junctions, aiming to  
344 find the optimal combination of new and old junctions.

345 The final step involves filtering the changes based on a selection of categories that have been  
346 observed to over-fix gene models. Firstly, we require the alignment score  $\alpha$  of a 10 amino acid region  
347 each side of the change to have either remained the same or improved. This is a basic requirement  
348 which should be met in most cases due to the way in which sequence variants are chosen. Secondly,  
349 changes that have opened gaps in the alignment of three or more of the sequences are not allowed:  
350 this is a common occurrence due to sequences proximal to exon termini that that by chance feature

351 valid splice junction sequences that are in frame with the adjacent exons and are evolutionarily  
352 conserved. These tend not to be correct. Thirdly, very small changes are forbidden: changes that  
353 have resulted in two or fewer amino acids being changed in a gapless region of the alignment, such  
354 that the new alignment is also gapless, are ignored. Similar changes to larger regions require an  $\alpha$   
355 increase of 4 or more. This is to avoid changes that reflect multiple choices of donor-acceptor pairs  
356 for essentially identical sequences. Thirdly, the alignment in the region of the change must be of  
357 reasonable quality: for unchanged 5 amino acid regions near the change, the adjusted alignment  
358 score  $\bar{\alpha}$  must be 3 or higher (or all gaps) for some subset of three sequences containing the  
359 sequence of interest. Similarly the resulting score for the changed region must also be higher than  
360 3 or all gaps. Exon boundaries that do not pass the filters are discarded and the genes are  
361 reconstructed a final time, allowing only the surviving boundaries and those that were present in the  
362 original gene. The resultant genes are outputted in GTF, amino acid FASTA and CDS FASTA format.

### 363 **Data sources**

364 For algorithm development and evaluation, a set of five small, well-annotated fungal genomes and  
365 a set of five well-annotated plant genomes (Table 1) were selected. Orthogroups were inferred using  
366 OrthoFinder [20]. For the plant data set, where multiple transcript variants were available, the primary  
367 transcript was used as listed in Phytozome [26]. RNA-seq data sources are listed in Table 2, and  
368 were downloaded from the Sequence Read Archive [23].

### 369 **De novo gene prediction**

370 *De novo* gene predictions were made using Augustus [22] version 3.2.2. Training was performed  
371 using all well-formed gene models from each species, and using the autoAugTrain.pl script included  
372 with the software. Augustus was run individually on each genome with the default settings.

### 373 **Alignment score**

374 An amino acid alignment can be considered as an ordered sequence  $A = (C_n)_{n=1}^{n=l}$  of columns  $C_n =$   
375  $(c_1^n, \dots, c_l^n)$ . The *column score*  $\gamma$  for a column  $C_n$  is defined as the average pairwise Blosum62 score  
376 for amino acids in that column:

$$377 \quad \gamma(C_n) = \frac{\sum_{1 \leq i < j \leq l} \text{Blos}(c_i^n, c_j^n)}{l}$$

378 The Blosum62 matrix was used as it is the basis for the MAFFT alignment algorithm. The *alignment*  
379 *score*  $\alpha$  for an alignment  $A$  is constructed column-wise as:

380 
$$\alpha(A) = \sum_{n=1}^l \gamma(C_n)$$

381 The *adjusted alignment score*  $\bar{\alpha}$  is defined as  $\bar{\alpha} = \frac{\alpha}{l}$ , where  $l$  is the alignment length.

## 382 **Multipartite choice function**

383 The multipartite choice function (Figure 7) aims, for a set of  $k$  gene regions and a set of  $l_k$  gene  
384 model variants for each gene region, to choose an optimal set containing one gene model variant  
385 from each gene region such that the alignment score is maximised. This problem is equivalent to  
386 finding the heaviest maximal clique in an edge-weighted complete multipartite graph.

387 To reduce the complexity of the problem, options are chosen by comparison with a reference  
388 consensus alignment, produced by taking the most consistent set of amino acids for each column in  
389 a global alignment individually (Figure 7A-B). This column-wise optimisation is fast, and provides a  
390 basis for the sequence-wide optimisation. To produce the consensus, The set of  $\sum l_k$  options is  
391 aligned to the reference (the original alignment) using MAFFT –add [27]. The inconsistent regions  
392 are then isolated and re-aligned using the more accurate but more computationally intensive MAFFT  
393 l-ins-i. For each column in the alignment, the set of amino acid choices (one for each gene region)  
394 that optimises the alignment score for that column is chosen as the consensus.

395 For each option  $i$  a binary string  $H_i = \{h_1^i, \dots, h_n^i\}$  is produced describing for each position in the  
396 alignment whether or not that option matches the consensus (Figure 7C). The chosen subset will be  
397 the set of options that globally maximises agreement with the consensus. If the strings  $\{H_i\}_i$  are  
398 stacked vertically, such that they can be read as columns  $\{V_j\}_{j=1}^n$  then the task is equivalent to finding  
399 a columnar binary string  $V$  with one nonzero entry for each gene region such that  $|V_i: V \subseteq V_i|$  is  
400 maximised.

401 Given the set  $A_0 = \{V_j\}_{j=1}^n$ , an optimal subset is deduced by sequential random sampling. Ignoring  
402 all-1 strings, an initial  $W_0 = V_k$  is chosen at random from  $A_0$ . For sets  $S_1, S_2$  and a set of “checkpoints”

403  $R$ , the set  $S_1$  is *compatible with*  $S_2$  with respect to  $R = \{R_i\}_i$  if the binary intersection  $S_1 \cap S_2 \cap R_i$  is  
404 nonzero for all  $i$ . Define  $A_n = \{a \cap W_{n-1} : a, W_{n-1} \text{ compatible w.r.t } G\}$ , where  $G$  is the set of binary  
405 strings which are zero for all but one gene region, at each stage choosing  $W_n$  at random from  $A_n$ .  
406 The process  $A_0, A_1, A_2, \dots$  eventually converges on a single binary string. This reduction is performed  
407 a user-selected number of times, the default being 1000. The result that is a subset of the largest  
408 number of  $V_i$  is declared the winner. In the event that the result still contains more than one option  
409 for each gene region, subsets of options are calculated and their multiple alignment score  $\alpha$  is  
410 calculated, the winner being the subset with the highest  $\alpha$ . In the event that multiple subsets exhibit  
411 the same maximal  $\alpha$ , a subset is chosen arbitrarily from them.

### 412 **Adjacency group calculation**

413 OMGene builds genes sequentially by iteratively adding in putative exons to multiple genes  
414 simultaneously. Care must be taken to ensure the gene parts (which in turn become exons once  
415 gene models are constructed) are added in a way conducive to vertical comparison of relevant  
416 regions (see Figure 8). In OMGene, gene parts are considered in sequential *adjacency groups* based  
417 on their coordinates in a multiple sequence alignment. Prototype gene models are formed by  
418 stringing together amino acid sequences for individual putative exons for each gene region: these  
419 are then aligned, and a graph is formed from this alignment. Each putative exon is a node on the  
420 graph, and two exons are connected by an edge if one of the exons overlaps the other by a third or  
421 more of its length. The adjacency groups are then defined to be cliques in this graph. Cliques are  
422 determined using the python implementation of the NetworkX package [28].

### 423 **Junction F-score**

424 The *junction F-score* for a gene is a measure of how well the splice junctions observed in mapped  
425 RNA-seq data are represented in the gene model. For a gene model  $G$  and corresponding gene  
426 region  $R$ , define  $J_G$  to be the set of individual intron beginning and end coordinates in the gene model,  
427 and define  $J_R$  to be the set of map junction beginning and end coordinates in the mapped RNA-seq  
428 data. A minimum of 10 reads is required for a given RNA-seq junction to be counted. We may then  
429 define the junction F-score as:



430 
$$j^F(J_G, J_R) = \frac{2 \cdot j^P(J_G, J_R) \cdot j^R(J_G, J_R)}{j^R(J_G, J_R) + j^P(J_G, J_R)}$$

431 where

432 
$$j^P(J_G, J_R) = \frac{|J_G \cap J_R|}{|J_G|}; \quad j^R(J_G, J_R) = \frac{|J_G \cap J_R|}{|J_R|}.$$

433 The direction of each junction site (start or end of a junction) is taken into account when considering  
434 the intersection of the two sets.

### 435 Coverage score

436 The *coverage score* is a measure of how well RNA-seq data represents a given gene. Given that  
437 gene expression levels can vary considerably and irregularly across the length of a transcript [13]–  
438 [16], care must be taken to ensure the expression profile for a gene region is properly interpreted.  
439 For example, sample preparation methods can bias coverage towards the centre and 3' ends of the  
440 transcript; furthermore, jagged read profiles and transcription of antisense regions [29] and other  
441 intronic ncRNAs can cause expression profiles to be highly non-binary. To mitigate this, a rolling  
442 threshold approach is used. For a gene region  $R$ , and a genomic coordinate  $x \in R$ , the expression  
443 characteristic  $\chi$  is defined as:

444 
$$\chi(x) = \min(\max(\{\rho(y) : y \in R, y < x\}), \max(\{\rho(y) : y \in R, y > x\}))$$

445 Where  $\rho(y)$  is the read count at genomic coordinate  $y$ . Bases in the gene region to which the RNA-  
446 seq data has been mapped are categorised based on whether they are likely to correspond to exonic  
447 or non-exonic regions: a base  $x$  is considered to be *on* (i.e. likely included in the mature mRNA) if  
448  $\rho(x) > \frac{\chi(x)}{5}$ , and *off* (i.e. likely not included in the mature mRNA) if  $\rho(x) < \frac{\chi(x)}{5}$ . The coverage score  
449 for a gene model  $G = \{G_1, \dots, G_n\}$ , where the  $G_i$  are alternately exons and introns, is defined to be:

450 
$$C(G) = \frac{1}{n} \left( \sum_{G_i \text{ exonic}} \frac{|\{x \in G_i : x \text{ on}\}|}{|G_i|} + \sum_{G_j \text{ intronic}} \frac{|\{x \in G_j : x \text{ off}\}|}{|G_j|} \right)$$

451 that is, the average length-adjusted coverage score for each individual feature in the gene.

452 **RNA-seq data**

453 RNA-seq data were downloaded from the Sequence Read Archive, and aligned to the genome with  
454 Hi-SAT2 [31], [32] using default parameters. Per-base coverage was calculated using SAMtools  
455 mpileup [33].

456 **Subcellular localisation analysis**

457 Subcellular localisation for both the plant and fungal datasets was determined using TargetP [25].  
458 For the plant dataset only, TargetP was run with the  $-P$  option to predict chloroplast targeting  
459 sequences. The localisation consistency for an orthogroup  $O$  was calculated as an entropy score  
460 across the categories for each gene:

461 
$$H(O) = -\frac{1}{|O|} \sum_{C \in \mathcal{C}(O)} \frac{|C|}{|O|} \cdot \log\left(\frac{|C|}{|O|}\right)$$

462 where  $\mathcal{C}(O) = \{C_1, \dots, C_n\}$  is the partition of genes in  $O$  into their localisation categories.

463

464 **Tables**

465 **Table 1: Species sets used for algorithm validation**

|                       | Species Name                    | Source           | Version/Strain | Taxonomy ID | References |
|-----------------------|---------------------------------|------------------|----------------|-------------|------------|
| <b>Plant species</b>  | <i>Arabidopsis thaliana</i>     | JGI              | TAIR10         | 3702        | [26]       |
|                       | <i>Brassica rapa</i>            | JGI              | v1.3           | 3711        | [26]       |
|                       | <i>Carica papaya</i>            | JGI              | ASGPBv0.4      | 3649        | [26]       |
|                       | <i>Capsella rubella</i>         | JGI              | v1.0           | 81985       | [26]       |
|                       | <i>Theobroma cacao</i>          | JGI              | v1.1           | 3641        | [26]       |
| <b>Fungal species</b> | <i>Eremothecium gossypii</i>    | JGI <sup>1</sup> | ATCC10895      | 284811      | [34]       |
|                       | <i>Debaromyces hansenii</i>     | JGI              | CBS767         | 284592      | [35] [36]  |
|                       | <i>Kluyveromyces lactis</i>     | JGI              | CLIB210        | 284590      | [35]       |
|                       | <i>Saccharomyces cerevisiae</i> | SGD <sup>2</sup> | S288C          | 559292      | [37]       |
|                       | <i>Yarrowia lipolytica</i>      | JGI              | CLIB122        | 284591      | [35]       |

466 <sup>1</sup>Joint Genome Institute; <sup>2</sup>Saccaromyces Genome Database

467 **Table 2: SRA RNA-seq data sources**

|                       | Species              | SRA ID           | Instrument/details                                                                  | Genes in original annotation |          |       |
|-----------------------|----------------------|------------------|-------------------------------------------------------------------------------------|------------------------------|----------|-------|
|                       |                      |                  |                                                                                     | Total                        | W/ reads | %     |
| <b>Plant species</b>  | <i>A. thaliana</i>   | SRR3932355       | Illumina HiSeq 2500, paired end. Wild type Columbia rep1                            | 27416                        | 26110    | 95.2  |
|                       | <i>B. rapa</i>       | SRR2984945       | Illumina HiSeq 2000, paired end. ga-deficient dwarf (gad1-2)<br>+GA rep2            | 40492                        | 35793    | 88.4  |
|                       | <i>C. papaya</i>     | SRR3509576       | Illumina HiSeq 2500, paired end. SunUp/Sunset cultivar,<br>young hermaphrodite leaf | 27751                        | 24589    | 88.6  |
|                       | <i>C. rubella</i>    | SRR797557        | Illumina Genome Analyzer Iix, paired end                                            | 26521                        | 21239    | 80.1  |
|                       | <i>T. cacao</i>      | SRR3217315       | Illumina HiSeq 2000, paired end. Flower/leaf sample                                 | 29452                        | 25758    | 87.5  |
| <b>Fungal species</b> | <i>E. gossypii</i>   | N/A <sup>1</sup> | N/A                                                                                 | 4768                         | N/A      | N/A   |
|                       | <i>D. hansenii</i>   | SRR1296968       | Illumina HiSeq 2000, paired end                                                     | 5781                         | 6272     | 92.2% |
|                       | <i>K. lactis</i>     | SRR1200528       | Illumina Genome Analyzer II, single                                                 | 5075                         | 5076     | 100%  |
|                       | <i>S. cerevisiae</i> | SRR539284        | Illumina HiSeq 2000, paired end                                                     | 6560                         | 6572     | 99.8% |
|                       | <i>Y. lipolytica</i> | SRR868669        | Illumina HiSeq 2000, single                                                         | 6432                         | 6447     | 99.8% |

468

469

470 **Table 3: Per-species gene change breakdown**

|                | Species                      | No. changed genes | Nucleotides added/removed (means per change) |                |                | In original annotation as alternative “non-primary” gene model |
|----------------|------------------------------|-------------------|----------------------------------------------|----------------|----------------|----------------------------------------------------------------|
|                |                              |                   | + (mean)                                     | - (mean)       | Net (mean)     |                                                                |
| Plant species  | <i>A. thaliana</i>           | 175               | 1749 (42.7)                                  | -23747 (-118)  | -22139 (-92)   | 53                                                             |
|                | <i>B. rapa</i>               | 97                | 1787 (58)                                    | -25740 (-250)  | -23953 (-179)  | 4                                                              |
|                | <i>C. papaya</i>             | 540               | 23820 (65)                                   | -72053 (-128)  | -48233 (-52)   | 0                                                              |
|                | <i>C. rubella</i>            | 298               | 6568 (71)                                    | -55005 (-170)  | -48437 (-117)  | 2                                                              |
|                | <i>T. cacao</i>              | 556               | 3700 (43)                                    | -120984 (-118) | -117284 (-124) | 95                                                             |
|                | <b>TOTAL</b>                 | 1666              | 37624 (61)                                   | -297529 (-145) | -259905 (-97)  | 154                                                            |
|                | <i>A. thaliana de novo</i>   | 598               | 13623 (42)                                   | -167038 (-35)  | -51177 (-57)   | N/A                                                            |
| Fungal species | <i>E. gossypii</i>           | 46                | 0 (0)                                        | -4338 (-93)    | -4338 (-93)    | N/A                                                            |
|                | <i>D. hansenii</i>           | 13                | 0 (0)                                        | -2080 (-149)   | -2080 (-149)   | N/A                                                            |
|                | <i>K. lactis</i>             | 11                | 0 (0)                                        | -1314 (-110)   | -1314 (-110)   | N/A                                                            |
|                | <i>S. cerevisiae</i>         | 11                | 93 (93)                                      | -2483 (-191)   | -2390 (-170)   | N/A                                                            |
|                | <i>Y. lipolytica</i>         | 23                | 117 (29)                                     | -4186 (-199)   | -4069 (-163)   | N/A                                                            |
|                | <b>TOTAL</b>                 | 104               | 210 (42)                                     | -14401 (-135)  | -14191 (-127)  | N/A                                                            |
|                | <i>S. cerevisiae de novo</i> | 19                | 601 (120)                                    | -5561 (-347)   | -4960 (-236)   | N/A                                                            |

471

472 **Table 4: Summary of gene model change categories**

|               | Species                    | No. changes | Exon boundary |           | Exon |      | Intron |     | Moved start |
|---------------|----------------------------|-------------|---------------|-----------|------|------|--------|-----|-------------|
|               |                            |             | contraction   | extension | add  | del  | add    | del |             |
| Plant species | <i>A. thaliana</i>         | 242         | 47            | 23        | 4    | 117  | 5      | 13  | 33          |
|               | <i>B. rapa</i>             | 134         | 11            | 14        | 9    | 56   | 3      | 8   | 33          |
|               | <i>C. papaya</i>           | 928         | 148           | 205       | 95   | 345  | 18     | 42  | 74          |
|               | <i>C. rubella</i>          | 415         | 32            | 32        | 39   | 101  | 1      | 19  | 191         |
|               | <i>T. cacao</i>            | 949         | 117           | 59        | 9    | 624  | 10     | 13  | 117         |
|               | <b>TOTAL</b>               | 2668        | 355           | 333       | 156  | 1243 | 37     | 95  | 448         |
|               | <i>A. thaliana de novo</i> | 1344        | 151           | 255       | 49   | 780  | 2      | 10  | 97          |
| Fungal        | <i>E. gossypii</i>         | 46          | 0             | 0         | 0    | 1    | 0      | 0   | 45          |
|               | <i>D. hansenii</i>         | 13          | 0             | 0         | 0    | 1    | 0      | 0   | 12          |

|                              |     |   |   |   |   |   |   |    |
|------------------------------|-----|---|---|---|---|---|---|----|
| <i>K. lactis</i>             | 11  | 0 | 0 | 0 | 0 | 0 | 0 | 11 |
| <i>S. cerevisiae</i>         | 13  | 1 | 0 | 0 | 0 | 1 | 1 | 10 |
| <i>Y. lipolytica</i>         | 24  | 0 | 0 | 0 | 4 | 5 | 0 | 15 |
| <b>TOTAL</b>                 | 107 | 1 | 0 | 0 | 6 | 6 | 1 | 93 |
| <i>S. cerevisiae de novo</i> | 20  | 0 | 2 | 0 | 4 | 0 | 2 | 12 |

473

474 **Table 5: RNA-seq coverage and junction F-scores**

|                | Species                      | Junction F-score |             | Coverage F-score |             |
|----------------|------------------------------|------------------|-------------|------------------|-------------|
|                |                              | Better           | Worse       | Better           | Worse       |
| Plant species  | <i>A. thaliana</i>           | 94 (87.8%)       | 13 (12.1%)  | 109 (91.5%)      | 10 (8.4%)   |
|                | <i>B. rapa</i>               | 24 (63.1%)       | 14 (36.8%)  | 29 (56.8%)       | 22 (43.1%)  |
|                | <i>C. papaya</i>             | 246 (82.2%)      | 53 (17.7%)  | 344 (83.9%)      | 66 (16.0%)  |
|                | <i>C. rubella</i>            | 90 (89.1%)       | 11 (10.8%)  | 186 (91.6%)      | 17 (8.3%)   |
|                | <i>T. cacao</i>              | 275 (88.9%)      | 34 (11.0%)  | 358 (87.3%)      | 52 (12.6%)  |
|                | <b>TOTAL</b>                 | 729 (85.3%)      | 125 (14.6%) | 1026 (86.0%)     | 167 (13.9%) |
|                | <i>A. thaliana de novo</i>   | 422 (87.3%)      | 61 (12.6%)  | 475 (91.1%)      | 46 (8.8%)   |
| Fungal species | <i>D. hansenii</i>           | 1 (100.0%)       | 0 (0%)      | 4 (66.6%)        | 2 (33.3%)   |
|                | <i>K. lactis</i>             | 0 (N/A)          | 0 (N/A)     | 9 (100.0%)       | 0 (0%)      |
|                | <i>S. cerevisiae</i>         | 0 (N/A)          | 0 (N/A)     | 6 (75.0%)        | 2 (25.0%)   |
|                | <i>Y. lipolytica</i>         | 2 (28.5%)        | 5 (71.4%)   | 11 (64.7%)       | 6 (35.2%)   |
|                | <b>TOTAL</b>                 | 3 (37.5%)        | 5 (62.5%)   | 30 (75.0%)       | 10 (25.0%)  |
|                | <i>S. cerevisiae de novo</i> | 4 (100%)         | 0 (0%)      | 11 (64.7%)       | 6 (35.2%)   |

475

476 **Table 6: Subcellular localisation predictions.**

|               | Category                   | No. orthogroups with changed localisation predictions | Entropy score |          |           |
|---------------|----------------------------|-------------------------------------------------------|---------------|----------|-----------|
|               |                            |                                                       | Better        | Same     | Worse     |
| Plant species | Public data                | 55                                                    | 42 (76.4%)    | 5 (7.7%) | 8 (14.5%) |
|               | <i>A. thaliana de novo</i> | 11                                                    | 9 (81.9%)     | 0 (0%)   | 2 (18.2%) |
| Fungal        | Public data                | 7                                                     | 6 (85.7%)     | 0 (0%)   | 1 (14.3%) |

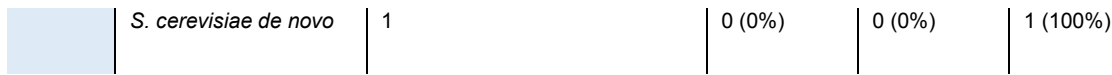

477

## 478 **Availability of data and materials**

479 The software is available under the GPLv3 licence at <https://github.com/mpdunne/omgene>.

## 480 **Competing Interests**

481 The authors declare that they have no competing interests.

## 482 **Funding**

483 SK is a Royal Society University Research Fellow. This work was supported by the European Union's  
484 Horizon 2020 research and innovation programme under grant agreement number 637765. MPD is  
485 supported by an EPSRC studentship through EP/G03706X/1.

## 486 **Author's Contributions**

487 SK conceived the project. MPD developed the algorithm. SK and MPD analysed the data and wrote  
488 the manuscript. Both authors read and approved the final manuscript.

## 489 **Figure Legends**

### 490 **Figure 1: OMGene workflow**

491 Simplified overview of OMGene workflow. A) Gene regions are extracted from around the gene  
492 model; B) Exonerate is used to cross-align all constituent exons and full open reading frames to  
493 construct basic prototype gene models; C) The exonic regions from these prototype gene models  
494 are sorted into adjacency groups, which are then sequentially optimised using the multipartite choice  
495 function; D) Results are compared against the original gene models to incorporate potentially  
496 overlooked combinations, and filtered under various criteria to produce results.

### 497 **Figure 2: Gene model change examples from *A. thaliana***

498 Examples of individual gene model changes for genes in *A. thaliana*. A) AT1G01320.1.TAIR10,  
499 orthogroup OG0010924, exon extension, splice acceptor side; B) AT1G76280.3.TAIR10, orthogroup  
500 OG10336, exon contraction, splice acceptor side; C) AT1G22860.1.TAIR10, orthogroup  
501 OG0010738, novel exon introduced; D) AT2G38720.1.TAIR10, orthogroup OG0009331, removed

502 exon; E) AT3G01980.3.TAIR10, orthogroup OG0011814, novel intron introduced; F)  
503 AT4G14590.1.TAIR10, orthogroup OG0010029, intron removed; G) AT3G01380.1.TAIR10,  
504 orthogroup OG0012127, moved start codon; G) AT5G11490.2.TAIR10, orthogroup OG0013306,  
505 complex event: exon has been removed and the previous exon boundary has been extended to  
506 include the stop codon.

### 507 **Figure 3: Number of changed genes per species**

508 Chart showing the number of changes made. A) *C. papaya* and *T. cacao* experienced the most  
509 changes in the plant data set. The *de novo* version of the *A. thaliana* genome underwent three times  
510 more changes than the publicly available one. B) The number of changes made was significantly  
511 less for the fungi data set. As in the plants, the representative species *S. cerevisiae* underwent more  
512 changes than the public version.

### 513 **Figure 4: Mean magnitude of changes made**

514 A) Average magnitudes of each change for plants. B) Average magnitudes for changes made to  
515 fungal genes.

### 516 **Figure 5: Change type distributions for plant and fungal genes**

517 Distribution of types of changes made in the two data sets. A) The most common change in plants  
518 was exon deletion. B) In fungi, the most common change was overwhelmingly a moved start codon.

### 519 **Figure 6: Example change in subcellular localisation prediction**

520 Example change in subcellular localisation prediction for a gene. Thecc1EG021604t1.CGDv1.1 from  
521 *T. cacao* has undergone a change in start codon, revealing a signalling peptide at its 5' end. In this  
522 case, what was previously assumed to be cytosolic has been found to target the secretory pathway,  
523 the same as the other members of the orthogroup (OG0009265). In this case, the Shannon entropy  
524 score for the orthogroup has fallen from 0.72 to 0.

## 525 **Figure 7: Multipartite Choice Function**

526 The choice function aims to find optimal variants from a set of protein sequences. A) Sequences are  
527 aligned; B) A consensus alignment is produced: on a column-by-column basis the choice of amino  
528 acid for each sequence that optimises the alignment score for that column is chosen as a  
529 representative; C) A binary representation is produced from the original alignment: for each base in  
530 alignment, a 1 is assigned if the base matches the consensus, and a 0 is assigned if it does not. This  
531 leaves a sequence of vertical binary strings. The aim is to find a single vertical binary string that  
532 agrees with (i.e. is a bitwise subset of) as many as possible of these, and that is also compatible  
533 with the category constraints. The best such string in this case is shown to the right in green. D) The  
534 result.

## 535 **Figure 8: Adjacency group calculation**

536 Calculation of adjacency groups. A) Amino acid sequences for individual putative exons are strung  
537 together and aligned. B) A graph is formed with vertices formed by gene parts (or exons), and edges  
538 drawn when the overlap between two parts is greater than or equal to two thirds the length of one of  
539 them. C) Cliques are extracted and then ordered lexicographically to form the adjacency groups.

540

## 541 **References**

- 542 [1] G. Cochrane, I. Karsch-mizrachi, and Y. Nakamura, "The International Nucleotide Sequence  
543 Database Collaboration The International Nucleotide Sequence Database Collaboration,"  
544 *Nucleic Acids Res.*, vol. 39, no. October 2017, pp. 14–18, 2011.
- 545 [2] M. Land, L. Hauser, S. Jun, I. Nookaew, M. R. Leuze, T. Ahn, T. Karpinets, O. Lund, and G.  
546 Kora, "Insights from 20 years of bacterial genome sequencing," *Funct Integr Genomics*, vol.  
547 15, pp. 141–161, 2015.
- 548 [3] NCBI, "GenBank and WGS Statistics," 2017. [Online]. Available:  
549 <https://www.ncbi.nlm.nih.gov/genbank/statistics/>.
- 550 [4] E. C. Hayden, "The \$1,000 genome," *Nature*, vol. 507, p. 295, 2014.
- 551 [5] K. Wetterstrand, "DNA Sequencing Costs: Data from the NHGRI Genome Sequencing  
552 Program (GSP)," Mar-2016. [Online]. Available: [www.genome.gov/sequencingcosts](http://www.genome.gov/sequencingcosts).



- 553 [6] M. Yandell and D. Ence, "A beginner's guide to eukaryotic genome annotation," *Nat. Rev.*  
554 *Genet.*, vol. 13, no. May, pp. 329–342, 2012.
- 555 [7] J. F. Denton, J. Lugo-Martinez, A. E. Tucker, D. R. Schrider, W. C. Warren, and M. W. Hahn,  
556 "Extensive Error in the Number of Genes Inferred from Draft Genome Assemblies," *PLOS*  
557 *Comput. Biol.*, vol. 10, no. 12, 2014.
- 558 [8] E. Veeckman, T. Ruttink, and K. Vandepoele, "Are We There Yet? Reliably Estimating the  
559 Completeness of Plant Genome Sequences," *Plant Cell*, vol. 28, no. August, pp. 1759–1768,  
560 2016.
- 561 [9] M. P. Dunne and S. Kelly, "OrthoFiller: utilising data from multiple species to improve the  
562 completeness of genome annotations," *BMC Genomics*, vol. 18, no. 1, p. 390, 2017.
- 563 [10] J. Nasiri, M. Naghavi, S. N. Rad, T. Yolmeh, M. Shirazi, R. Naderi, M. Nasiri, and S. Ahmadi,  
564 "Gene Identification Programs in Bread Wheat: A Comparison Study," *Nucleosides,*  
565 *Nucleotides and Nucleic Acids*, vol. 32, no. 10, pp. 529–554, 2013.
- 566 [11] P. H. Sudmant, M. S. Alexis, and C. B. Burge, "Meta-analysis of RNA-seq expression data  
567 across species, tissues and studies," *Genome Biol.*, vol. 16, no. 1, p. 287, 2015.
- 568 [12] F. Danielsson, T. James, D. Gomez-Cabrero, and M. Huss, "Assessing the consistency of  
569 public human tissue RNA-seq data sets," *Brief. Bioinform.*, vol. 16, no. 6, pp. 941–949, 2015.
- 570 [13] A. Conesa, P. Madrigal, S. Tarazona, D. Gomez-cabrero, A. Cervera, A. Mcpherson, W.  
571 Szcze, D. J. Gaffney, L. L. Elo, and X. Zhang, "A survey of best practices for RNA-seq data  
572 analysis," *Genome Biol.*, vol. 17, no. 13, 2016.
- 573 [14] L. Wang, J. Nie, H. Sicotte, Y. Li, J. E. Eckel-passow, S. Dasari, P. T. Vedell, P. Barman, L.  
574 Wang, R. Weinshiboum, J. Jen, H. Huang, M. Kohli, and J. A. Kocher, "Measure transcript  
575 integrity using RNA-seq data," *BMC Bioinformatics*, pp. 1–16, 2016.
- 576 [15] K. D. Hansen, S. E. Brenner, and S. Dudoit, "Biases in Illumina transcriptome sequencing  
577 caused by random hexamer priming," *Nucleic Acids Res.*, vol. 38, no. 12, 2010.
- 578 [16] H. Jiang and J. Salzman, "A penalized likelihood approach for robust estimation of isoform  
579 expression," *Stat Interface*, vol. 8, no. 4, pp. 437–445, 2015.
- 580 [17] J. F. Abril, R. Castelo, and R. Guigó, "Comparison of splice sites in mammals and chicken,"  
581 *Genome Res.*, vol. 15, no. 1, pp. 111–119, 2005.

- 582 [18] M. J. Betts, R. Guigó, P. Agarwal, and R. B. Russell, “Exon structure conservation despite low  
583 sequence similarity: A relic of dramatic events in evolution?,” *EMBO J.*, vol. 20, no. 19, pp.  
584 5354–5360, 2001.
- 585 [19] R. N. Nurtdinov, A. D. Neverov, A. V Favorov, A. A. Mironov, and M. S. Gelfand, “Conserved  
586 and species-specific alternative splicing in mammalian genomes,” *BMC Evol. Biol.*, vol. 7, no.  
587 1, p. 249, 2007.
- 588 [20] D. M. Emms and S. Kelly, “OrthoFinder: solving fundamental biases in whole genome  
589 comparisons dramatically improves orthogroup inference accuracy,” *Genome Biol.*, vol. 16,  
590 no. 1, p. 157, 2015.
- 591 [21] G. Slater, E. Birney, G. Box, T. Smith, M. Waterman, S. Altschul, W. Gish, W. Miller, E. Myers,  
592 D. Lipman, D. Searls, K. Murphy, D. Searls, E. Birney, R. Durbin, O. Gotoh, R. Mott, S.  
593 Altschul, N. Jareborg, E. Birney, R. Durbin, E. Birney, J. Thompson, T. Gibson, E. Birney, M.  
594 Clamp, R. Durbin, R. Smith, D. Lipman, W. Pearson, L. Florea, G. Hartzell, Z. Zhang, G.  
595 Rubin, W. Miller, Z. Ning, A. Cox, J. Mullikin, S. Burkhardt, A. Crauser, P. Ferragina, H.  
596 Lenhof, E. Rivals, M. Vingron, K. Chao, W. Pearson, W. Miller, S. Altschul, T. Madden, A.  
597 Schäffer, J. Zhang, Z. Zhang, W. Miller, D. Lipman, A. Aho, M. Corasick, I. Korf, W. Gish, D.  
598 Eppstein, Z. Galil, R. Giancarlo, G. Italiano, K. Chao, J. Zhang, J. Ostell, W. Miller, M.  
599 Waterman, M. Eggert, V. Curwen, E. Eyraş, T. Andrews, L. Clarke, E. Mongin, S. Searle, M.  
600 Clamp, P. Deloukas, L. Matthews, J. Ashurst, J. Burton, J. Gilbert, M. Jones, G. Stavrides, J.  
601 Almeida, A. Babbage, C. Bagguley, J. Bailey, K. Barlow, K. Bates, L. Beard, D. Beare, O.  
602 Beasley, C. Bird, S. Blakey, A. Bridgeman, A. Brown, D. Buck, W. Burrill, A. Butler, C. Carder,  
603 N. Carter, J. Chapman, M. Clamp, G. Clark, L. Clark, S. Clark, C. Clee, S. Clegg, V. Cobley,  
604 R. Collier, R. Connor, N. Corby, A. Coulson, G. Coville, R. Dead-man, P. Dhami, M. Dunn, A.  
605 Ellington, J. Frankland, A. Fraser, L. French, P. Garner, D. Grafham, C. Griffiths, M. Griffiths,  
606 R. Gwilliam, R. Hall, S. Hammond, J. Harley, P. Heath, S. Ho, J. Holden, P. Howden, E.  
607 Huckle, A. Hunt, S. Hunt, K. Jekosch, C. Johnson, D. Johnson, M. Kay, A. Kimberley, A. King,  
608 A. Knights, G. Laird, S. Lawlor, M. Lehtvaslaiho, M. Leversha, C. Lloyd, D. Lloyd, J. Lovell, V.  
609 Marsh, S. Martin, L. McConnachie, K. McLay, A. McMurray, S. Milne, D. Mistry, M. Moore, J.  
610 Mullikin, T. Nickerson, K. Oliver, A. Parker, R. Patel, T. Pearce, A. Peck, B. Phillimore, S.

- 611 Prathalingam, R. Plumb, H. Ramsay, C. Rice, M. Ross, C. Scott, H. Sehra, R. Shownkeen, S.  
612 Sims, C. Skuce, M. Smith, C. Soderlund, C. Steward, J. Sulston, M. Swann, N. Sycamore, R.  
613 Taylor, L. Tee, D. Thomas, A. Thorpe, A. Tracey, A. Tromans, M. Vaudin, M. Wall, J. Wallis,  
614 S. Whitehead, P. Whittaker, D. Willey, L. Williams, S. Williams, L. Wilming, P. Wray, T.  
615 Hubbard, R. Durbin, D. Bentley, S. Beck, J. Rogers, E. Rivas, S. Eddy, E. Snyder, G. Stormo,  
616 A. Delcher, S. Kasif, R. Fleischmann, J. Peterson, O. White, and S. Salzberg, "Automated  
617 generation of heuristics for biological sequence comparison," *BMC Bioinformatics*, vol. 6, no.  
618 1, p. 31, 2005.
- 619 [22] M. Stanke and B. Morgenstern, "AUGUSTUS: A web server for gene prediction in eukaryotes  
620 that allows user-defined constraints," *Nucleic Acids Res.*, vol. 33, no. SUPPL. 2, pp. 465–467,  
621 2005.
- 622 [23] R. Leinonen, H. Sugawara, and M. Shumway, "The sequence read archive," vol. 454, pp. 1–  
623 3, 2010.
- 624 [24] G. Schneider and U. Fechner, "Advances in the prediction of protein targeting signals.,"  
625 *Proteomics*, vol. 4, no. 6, pp. 1571–1580, Jun. 2004.
- 626 [25] O. Emanuelsson, H. Nielsen, S. Brunak, and G. von Heijne, "Predicting subcellular localization  
627 of proteins based on their N-terminal amino acid sequence.," *J. Mol. Biol.*, vol. 300, no. 4, pp.  
628 1005–1016, Jul. 2000.
- 629 [26] D. M. Goodstein, S. Shu, R. Howson, R. Neupane, R. D. Hayes, J. Fazo, T. Mitros, W. Dirks,  
630 U. Hellsten, N. Putnam, and D. S. Rokhsar, "Phytozome: A comparative platform for green  
631 plant genomics," *Nucleic Acids Res.*, vol. 40, no. D1, pp. 1178–1186, 2012.
- 632 [27] K. Katoh and D. M. Standley, "MAFFT Multiple Sequence Alignment Software Version 7 :  
633 Improvements in Performance and Usability Article Fast Track," *Mol. Biol. Evol.*, vol. 30, no.  
634 4, pp. 772–780, 2013.
- 635 [28] A. A. Hagberg, D. A. Schult, and P. J. Swart, "Exploring network structure, dynamics, and  
636 function using {NetworkX}," *Proc. 7<sup>th</sup> Python Sci. Conf.*, no. SciPy, pp. 11–  
637 15, 2008.
- 638 [29] V. Pelechano and L. M. Steinmetz, "Gene regulation by antisense transcription," *Nat. Publ.  
639 Gr.*, vol. 14, no. 12, pp. 880–893, 2013.

- 640 [30] L. Nguyen, H. A. Schmidt, A. Von Haeseler, and B. Q. Minh, "IQ-TREE : A Fast and Effective  
641 Stochastic Algorithm for Estimating Maximum-Likelihood Phylogenies," *Mol Biol Evol*, vol. 32,  
642 no. 1, pp. 268–274, 2014.
- 643 [31] D. Kim, B. Langmead, and S. Salzberg, "HISAT2: Graph-Based Alignment of Next-Generation  
644 Sequencing Reads to a Population of Genomes." 2017.
- 645 [32] D. Kim, B. Langmead, and S. L. Salzberg, "HISAT : a fast spliced aligner with low memory  
646 requirements," *Nat. Methods*, vol. 12, no. 4, pp. 357–362, 2015.
- 647 [33] H. Li, B. Handsaker, A. Wysoker, T. Fennell, J. Ruan, N. Homer, G. Marth, G. Abecasis, R.  
648 Durbin, G. P. Data, and T. Sam, "The Sequence Alignment / Map format and SAMtools,"  
649 *Bioinformatics*, vol. 25, no. 16, pp. 2078–2079, 2009.
- 650 [34] F. S. Fred S. Dietrich, S. Voegeli, S. Brachat, A. Lerch, K. Gates, S. Steiner, C. Mohr, P.  
651 Luedi, S. Choi, R. A. Wing, A. Flavier, T. D. Gaffney, P. Philippsen, and P. Fred S. Dietrich,  
652 Fred S and Voegeli, Sylvia and Brachat, Sophie and Lerch, Anita and Gates, Krista and  
653 Steiner, Sabine and Mohr, Christine and Luedi, Philippe and Choi, Sangdun and Wing, Rod  
654 A and Flavier, Albert and Gaffney, Thomas D and Philippsen, "The *Ashbya gossypii* Genome  
655 as a Tool for Mapping the Ancient *Saccharomyces cerevisiae* Genome," *Science (80-. )*, vol.  
656 304, no. April, 2004.
- 657 [35] B. Dujon, D. Sherman, G. Fischer, P. Durrens, S. Casaregola, I. Lafontaine, J. De Montigny,  
658 S. Blanchin, J.-M. Beckerich, E. Beyne, C. Bleykasten, A. Babour, J. Boyer, L. Cattolico, F.  
659 Confanioleri, A. De Daruvar, L. Despons, E. Fabre, J. De Montigny, C. Marck, C. Neuvéglise,  
660 E. Talla, N. Goffard, L. Frangeul, M. Aigle, V. Anthouard, A. Babour, V. Barbe, S. Barnay, S.  
661 Blanchin, J.-M. Beckerich, E. Beyne, C. Bleykasten, A. Boisramé, J. Boyer, L. Cattolico, F.  
662 Confanioleri, A. De Daruvar, L. Despons, E. Fabre, C. Fairhead, H. Ferry-Dumazet, A. Groppi,  
663 F. Hantraye, C. Hennequin, N. Jauniaux, P. Joyet, R. Kachouri, A. Kerrest, R. Koszul, M.  
664 Lemaire, I. Lesur, L. Ma, H. Muller, J.-M. Nicaud, M. Nikolski, S. Oztas, O. Ozier-  
665 Kalogeropoulos, S. Pellenz, S. Potier, G.-F. Richard, M.-L. Straub, A. Suleau, D. Swennen,  
666 F. Tekaia, M. Wésolowski-Louvel, E. Westhof, B. Wirth, M. Zeniou-Meyer, I. Zivanovic, M.  
667 Bolotin-Fukuhara, A. Thierry, C. Bouchier, B. Caudron, C. Scarpelli, C. Gaillardin, J.  
668 Weissenbach, P. Wincker, and J.-L. Souciet, "Genome evolution in yeasts," *Nature*, vol. 430,

669 no. 6995, pp. 35–44, 2004.

670 [36] C. Sacerdot, S. Casaregola, I. Lafontaine, F. Tekaia, B. Dujon, and O. Ozier-kalogeropoulos,  
671 “Promiscuous DNA in the nuclear genomes of hemiascomycetous yeasts,” *FEMS Yeast Res.*,  
672 vol. 8, no. 6, pp. 846–857, 2008.

673 [37] S. Gnerre, I. Maccallum, D. Przybylski, F. J. Ribeiro, J. N. Burton, B. J. Walker, L. Williams,  
674 R. Nicol, A. Gnirke, C. Nusbaum, E. S. Lander, D. B. Jaffe, T. Sharpe, G. Hall, T. P. Shea, S.  
675 Sykes, A. M. Berlin, D. Aird, M. Costello, R. Daza, L. Williams, R. Nicol, A. Gnirke, C.  
676 Nusbaum, E. S. Lander, and D. B. Jaffe, “High-quality draft assemblies of mammalian  
677 genomes from massively parallel sequence data,” *PNAS*, vol. 108, no. 4, pp. 1513–1518,  
678 2011.

679

680

681 **Figures**

682 **Figure 1: OMGene workflow**

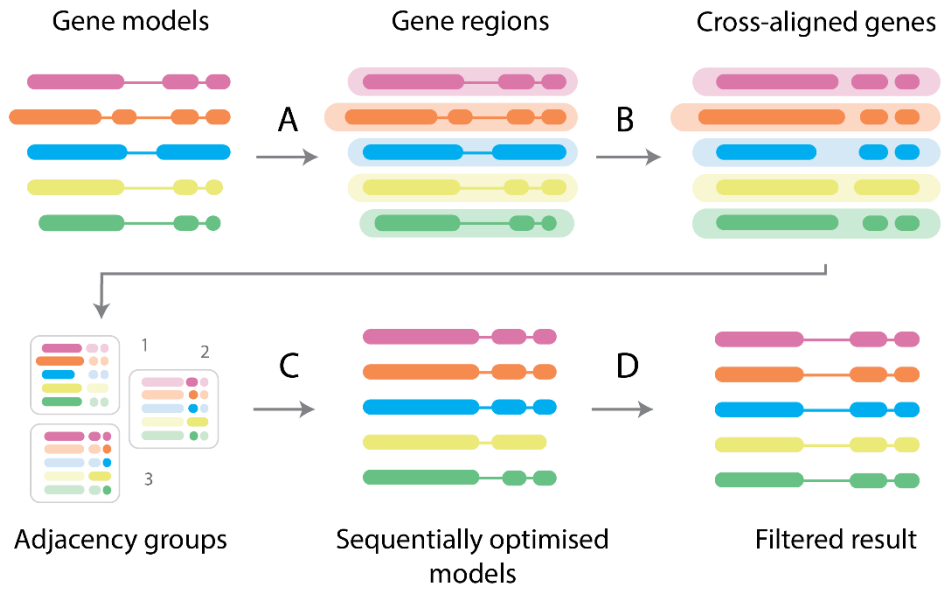

683

684

685 **Figure 2: Gene model change examples from *A. thaliana***

A) Exon boundary contraction (OG0010924)

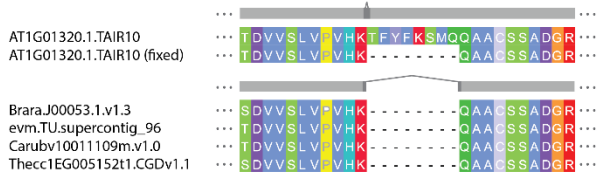

B) Exon boundary extension (OG0010336)

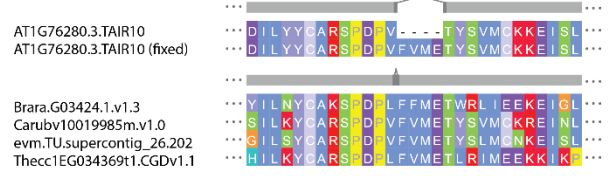

C) Exon added (OG0010738)

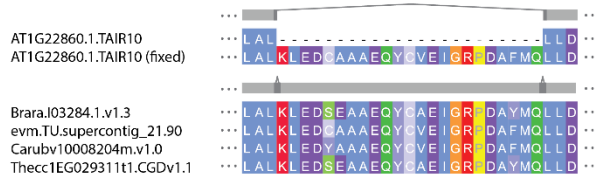

D) Exon removed (OG0009331)

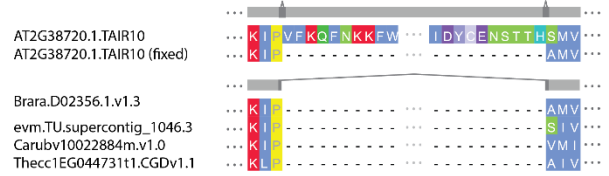

E) Intron added (OG0011814)

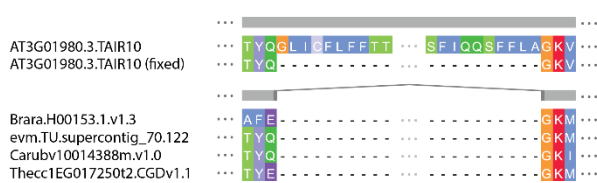

F) Intron removed (OG0010029)

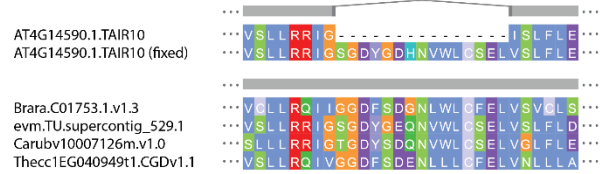

G) Moved start codon (OG0012127)

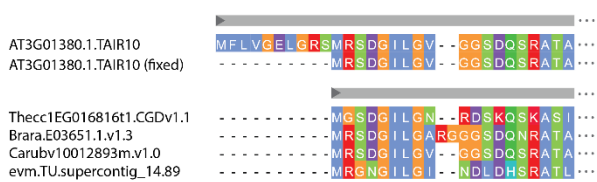

H) Complex (OG0013306)

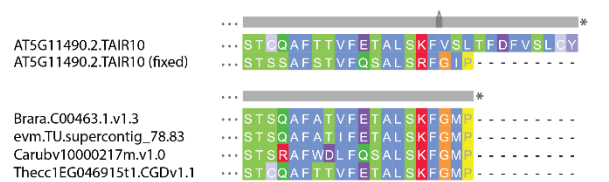

687 **Figure 3: Number of changed genes per species**

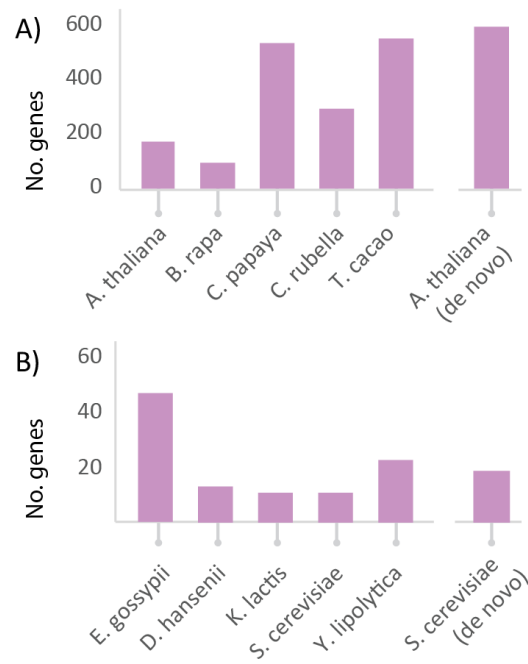

688

689 **Figure 4: Mean magnitude of changes made**

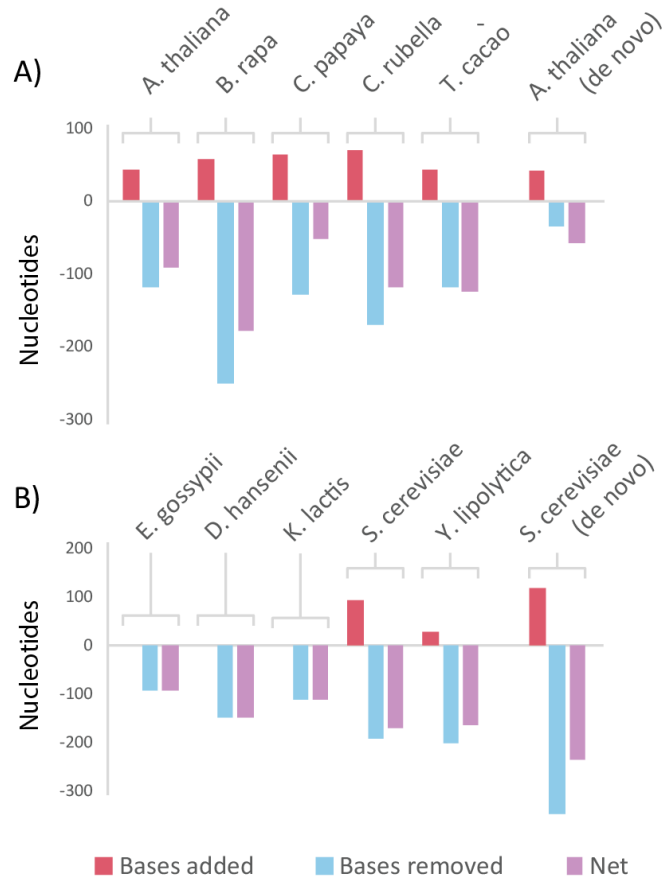

690

691



692

693 **Figure 5: Change type distributions for plant and fungal genes**

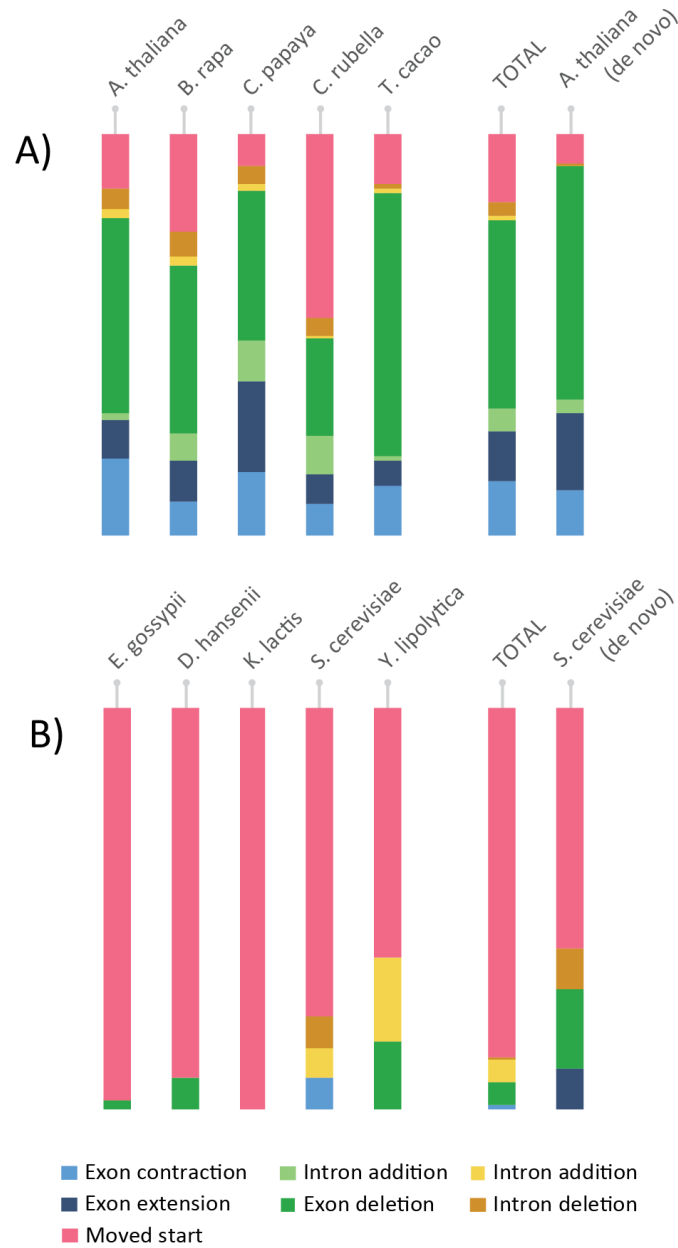

694

695 **Figure 6: Example change in subcellular localisation prediction**

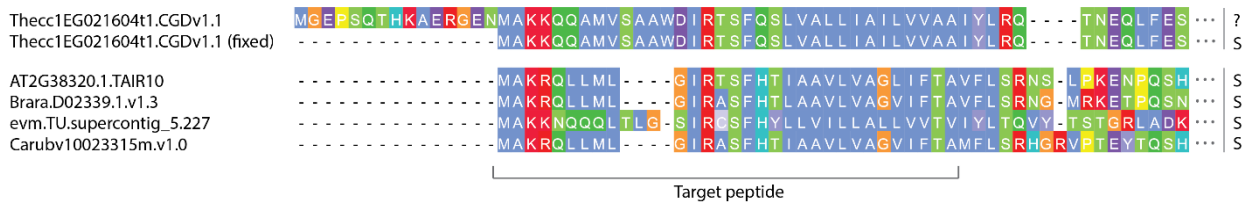

696

697 **Figure 7: Multipartite Choice Function**

698

A) Alignment of all options

C) Agreement with consensus

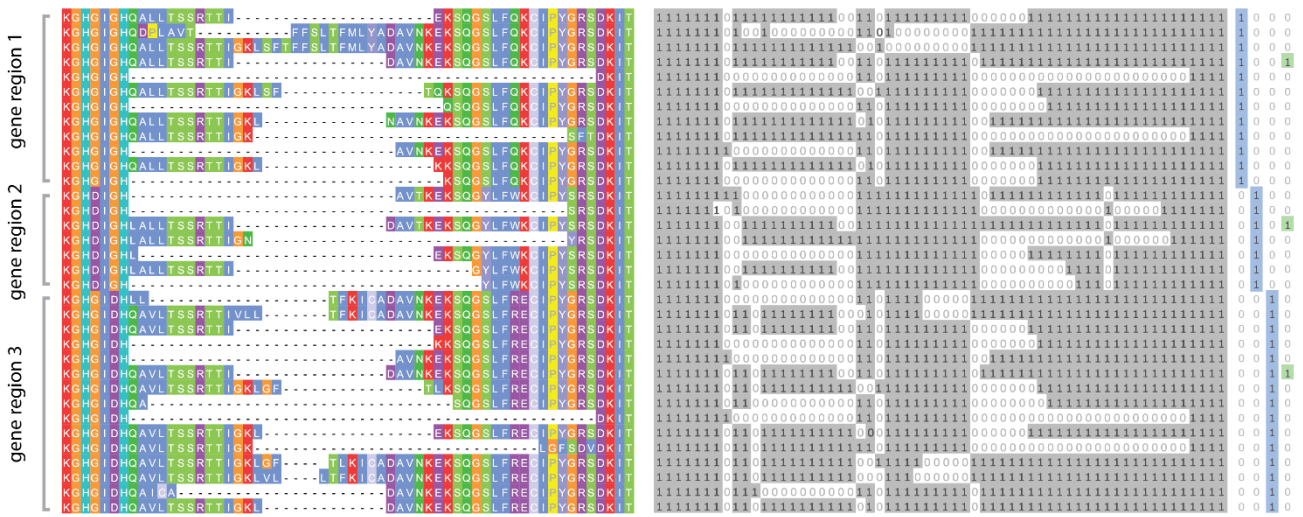

B) Column-wise best choice (consensus)

D) Result

KGHGIGHQALLTSSRTTIGKLF-----DAVNKEKSOGSLFQKIIYGRSDKIT  
 KGHDIGHALLTSSRTTIGK-----DAVTKEKSOGYLFWKIIYSRSDKIT  
 KGHDHQAVLTSSRTTIGKLF-----DAVNKEKSOGSLFREIIYGRSDKIT

699

700

701

702

Figure 8: Adjacency group calculation

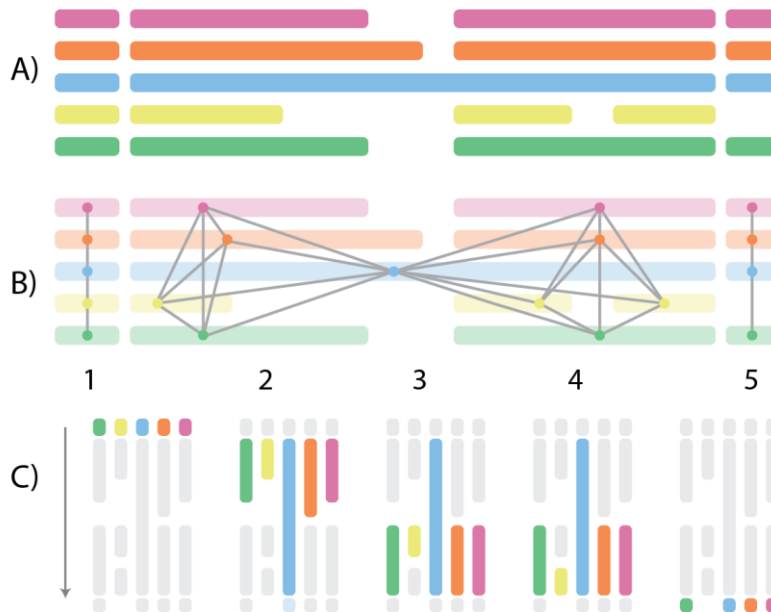

703

704
